# Supplementary material
Source: PubMed Central journal article supplement (PMC4644116)
Supplement: NIHMS721761-supplement-01.pdf [file NIHMS721761-supplement-01.pdf]

## **ONLINE-ONLY MATERIAL (Supplementary Materials)**

### **Effects of integrated interventions on transmission risk and care continuum outcomes in persons living with HIV: Meta-analysis, 1996-2014**

Nicole Crepaz, Brittney N. Baack, Darrel H. Higa, and Mary M. Mullins

#### **Contents**

|                                                                                 |            |
|---------------------------------------------------------------------------------|------------|
| Supplementary Material A:                                                       |            |
| PRISMA checklist                                                                | Page 30-31 |
| Supplementary Material B:                                                       |            |
| List of electronic databases and platforms for automated searches               | Page 32    |
| Supplementary Material C:                                                       |            |
| MEDLINE search as an example                                                    | Page 33-37 |
| Appendix a: Risk Reduction Search (RR)                                          |            |
| Appendix b: Medication Adherence Search (MA)                                    |            |
| Appendix c: Linkage to, Retention in and Re-engagement in HIV Care Search (LRC) |            |
| Appendix d: Overview of Review Search (ORP)                                     |            |
| Supplementary Material D:                                                       |            |
| List of 60 journals used in Manual Search                                       | Page 38    |
| Supplementary Material E:                                                       |            |
| List of 133 studies excluded from the review                                    | Page 39-49 |
| Supplementary Material F:                                                       |            |
| Risk of Bias Assessment (Study Level)                                           | Page 50    |

## Supplementary Material A: PRISMA Checklist

| Section/topic             | #  | Checklist item                                                                                                                                                                                                                                                                                              | Reported on page #                                                                 |
|---------------------------|----|-------------------------------------------------------------------------------------------------------------------------------------------------------------------------------------------------------------------------------------------------------------------------------------------------------------|------------------------------------------------------------------------------------|
| <b>TITLE</b>              |    |                                                                                                                                                                                                                                                                                                             |                                                                                    |
| Title                     | 1  | Identify the report as a systematic review, meta-analysis, or both.                                                                                                                                                                                                                                         | p.1 (due to the limit, we are not able to indicate systematic review in the title) |
| <b>ABSTRACT</b>           |    |                                                                                                                                                                                                                                                                                                             |                                                                                    |
| Structured summary        | 2  | Provide a structured summary including, as applicable: background; objectives; data sources; study eligibility criteria, participants, and interventions; study appraisal and synthesis methods; results; limitations; conclusions and implications of key findings; systematic review registration number. | p.2                                                                                |
| <b>INTRODUCTION</b>       |    |                                                                                                                                                                                                                                                                                                             |                                                                                    |
| Rationale                 | 3  | Describe the rationale for the review in the context of what is already known.                                                                                                                                                                                                                              | p.3                                                                                |
| Objectives                | 4  | Provide an explicit statement of questions being addressed with reference to participants, interventions, comparisons, outcomes, and study design (PICOS).                                                                                                                                                  | p.4                                                                                |
| <b>METHODS</b>            |    |                                                                                                                                                                                                                                                                                                             |                                                                                    |
| Protocol and registration | 5  | Indicate if a review protocol exists, if and where it can be accessed (e.g., Web address), and, if available, provide registration information including registration number.                                                                                                                               | p.4                                                                                |
| Eligibility criteria      | 6  | Specify study characteristics (e.g., PICOS, length of follow-up) and report characteristics (e.g., years considered, language, publication status) used as criteria for eligibility, giving rationale.                                                                                                      | p.5-6                                                                              |
| Information sources       | 7  | Describe all information sources (e.g., databases with dates of coverage, contact with study authors to identify additional studies) in the search and date last searched.                                                                                                                                  | p.5-7                                                                              |
| Search                    | 8  | Present full electronic search strategy for at least one database, including any limits used, such that it could be repeated.                                                                                                                                                                               | Suppl Material B & C                                                               |
| Study selection           | 9  | State the process for selecting studies (i.e., screening, eligibility, included in systematic review, and, if applicable, included in the meta-analysis).                                                                                                                                                   | Figure 1                                                                           |
| Data collection process   | 10 | Describe method of data extraction from reports (e.g., piloted forms, independently, in duplicate) and any processes for obtaining and confirming data from investigators.                                                                                                                                  | p.6-8                                                                              |
| Data items                | 11 | List and define all variables for which data were sought (e.g., PICOS, funding sources) and any assumptions and simplifications made.                                                                                                                                                                       | p.6-8                                                                              |

|                                    |    |                                                                                                                                                                                                                        |                            |
|------------------------------------|----|------------------------------------------------------------------------------------------------------------------------------------------------------------------------------------------------------------------------|----------------------------|
| Risk of bias in individual studies | 12 | Describe methods used for assessing risk of bias of individual studies (including specification of whether this was done at the study or outcome level), and how this information is to be used in any data synthesis. | p.7-8                      |
| Summary measures                   | 13 | State the principal summary measures (e.g., risk ratio, difference in means).                                                                                                                                          | p.8                        |
| Synthesis of results               | 14 | Describe the methods of handling data and combining results of studies, if done, including measures of consistency (e.g., $I^2$ ) for each meta-analysis.                                                              | p.7-9                      |
| Risk of bias across studies        | 15 | Specify any assessment of risk of bias that may affect the cumulative evidence (e.g., publication bias, selective reporting within studies).                                                                           | p.9                        |
| Additional analyses                | 16 | Describe methods of additional analyses (e.g., sensitivity or subgroup analyses, meta-regression), if done, indicating which were pre-specified.                                                                       | p.8-9                      |
| <b>RESULTS</b>                     |    |                                                                                                                                                                                                                        |                            |
| Study selection                    | 17 | Give numbers of studies screened, assessed for eligibility, and included in the review, with reasons for exclusions at each stage, ideally with a flow diagram.                                                        | Figure 1, Suppl material E |
| Study characteristics              | 18 | For each study, present characteristics for which data were extracted (e.g., study size, PICOS, follow-up period) and provide the citations.                                                                           | Table 1                    |
| Risk of bias within studies        | 19 | Present data on risk of bias of each study and, if available, any outcome level assessment (see item 12).                                                                                                              | Suppl material F           |
| Results of individual studies      | 20 | For all outcomes considered (benefits or harms), present, for each study: (a) simple summary data for each intervention group (b) effect estimates and confidence intervals, ideally with a forest plot.               | Figure 2                   |
| Synthesis of results               | 21 | Present results of each meta-analysis done, including confidence intervals and measures of consistency.                                                                                                                | Figure 2                   |
| Risk of bias across studies        | 22 | Present results of any assessment of risk of bias across studies (see Item 15).                                                                                                                                        | p.11, Table 2              |
| Additional analysis                | 23 | Give results of additional analyses, if done (e.g., sensitivity or subgroup analyses, meta-regression [see Item 16]).                                                                                                  | p. 11, Table 2             |
| <b>DISCUSSION</b>                  |    |                                                                                                                                                                                                                        |                            |
| Summary of evidence                | 24 | Summarize the main findings including the strength of evidence for each main outcome; consider their relevance to key groups (e.g., healthcare providers, users, and policy makers).                                   | p.12-13                    |
| Limitations                        | 25 | Discuss limitations at study and outcome level (e.g., risk of bias), and at review-level (e.g., incomplete retrieval of identified research, reporting bias).                                                          | p.13-14                    |
| Conclusions                        | 26 | Provide a general interpretation of the results in the context of other evidence, and implications for future research.                                                                                                | p.12-15                    |
| <b>FUNDING</b>                     |    |                                                                                                                                                                                                                        |                            |
| Funding                            | 27 | Describe sources of funding for the systematic review and other support (e.g., supply of data); role of funders for the systematic review.                                                                             | Financial support          |

## Supplementary Material B: List of Electronic Databases and Platforms for Automated Searches

| Database               | Platform  | Risk Reduction (RR) | Medication Adherence (MA) | Linkage To and Retention and Re-Engagement in HIV Care (LRC) | Systematic Reviews of HIV Prevention |
|------------------------|-----------|---------------------|---------------------------|--------------------------------------------------------------|--------------------------------------|
| CINAHL                 | EBSCOhost |                     | X                         | X                                                            | X                                    |
| EMBASE                 | OVID      | X                   | X                         | X                                                            | X                                    |
| MEDLINE                | OVID      | X                   | X                         | X                                                            | X                                    |
| PsycINFO               | OVID      | X                   | X                         | X                                                            | X                                    |
| Sociological Abstracts | ProQuest  | X                   |                           |                                                              | X                                    |
| CAB Global Health      | OVID      |                     |                           |                                                              | X                                    |

### Database References:

- CAB Global Health [Database Online] New York, NY: Wolters, Kluwer. <http://www.ovid.com/site/index.jsp>. Accessed December 31, 2014.
- CINAHL-EBSCO [Database Online]. Ipswich, MA: EBSCO. <http://www.ebscohost.com/nursing/products/cinahl-databases/cinahl-complete>. Accessed December 31, 2014.
- EMBASE-OVID [Database Online]. New York, NY: Wolters, Kluwer. <http://www.ovid.com/site/index.jsp>. Accessed December 31, 2014.
- MEDLINE-OVID [Database Online]. New York, NY: Wolters, Kluwer. <http://www.ovid.com/site/index.jsp>. Accessed December 31, 2014.
- PsycINFO-OVID [Database Online]. New York, NY: Wolters, Kluwer. <http://www.ovid.com/site/index.jsp>. Accessed December 31, 2014.
- Sociological Abstracts [Database Online]. Ann Arbor, MI: ProQuest. <http://www.proquest.com/products-services/socioabs-set-c.html>. Accessed December 31, 2014.

## Supplementary Material C: MEDLINE search strategy (in OVID)

### Appendix a: Risk Reduction (RR) Search

#### HIV/AIDS/STDs MeSH

1. \*HIV infections/pc
2. \*Acquired Immunodeficiency Syndrome/pc
3. \*Sexually Transmitted Diseases/pc
4. \*Sexually Transmitted Diseases, bacterial/
5. \*Sexually Transmitted Diseases, viral/
6. AIDS Serodiagnosis/ut
7. \*HIV Seropositivity/
8. or/1-7

#### Prevention/Intervention/Evaluation/ Education MeSH and Keywords

9. Primary Prevention/
10. Preventive Health Services/
11. Health Promotion/
12. Program Evaluation/
13. Randomized Controlled Trials/
14. Evaluation Studies/
15. Contact Tracing/
16. Case management/
17. Needle-Exchange Programs/
18. Intervention Studies/
19. Follow-Up Studies/
20. Longitudinal Studies/
21. Multicenter Studies/
22. Random Allocation/
23. control group.ti,ab
24. control trial.ti,ab
25. controlled trial.ti,ab
26. (rct or rcts).ti,ab
27. case management.ti,ab
28. contact tracing.ti,ab
29. (counseling or counselling).ti,ab
30. (detox or detoxification).ti,ab
31. (drug\$ adj4 treatment\$).ti,ab
32. education\$.ti,ab
33. (effect or effects or effective or effectiveness).ti,ab
34. efficacy.ti,ab
35. evaluation\$.ti,ab
36. impact\$.ti,ab
37. intervention\$.ti,ab
38. needle exchange\$.ti,ab

39. network\$.ti,ab
40. outreach\$.ti,ab
41. partner notification.ti,ab
42. (partner\$ adj4 contact\$ adj4 referral\$).ti,ab
43. (notif\$ adj4 partner\$).ti,ab
44. prevention\$.ti,ab
45. program\$.ti,ab
46. random\$.ti,ab
47. rehab\$.ti,ab
48. skill\$.ti,ab
49. syringe exchange\$.ti,ab
50. methadone.ti,ab
51. test\$.ti,ab
52. training.ti,ab
53. trial\$.ti,ab
54. or/9-53

#### Behavior/Outcomes MeSH and Keywords

55. Behavior/
56. Behavior Therapy/
57. Health Behavior/
58. Risk Reduction Behavior/
59. Risk-Taking/
60. Contraception Behavior/
61. Coitus/
62. Sexual Abstinence/
63. Sexual Behavior/
64. Sexual Partners/
65. Safe Sex/
66. Unsafe sex/
67. Heroin Dependence/pc
68. Needle Sharing/
69. Condoms/ut
70. Condoms, female/ut
71. Contraceptive devices, male/ut
72. Contraceptive devices, female/ut
73. Substance abuse, intravenous/pc
74. Substance-related disorders/pc
75. Cocaine-related disorders/pc
76. Health services/ut
77. heroin.ti,ab
78. cocaine.ti,ab
79. opiate\$.ti,ab
80. opium.ti,ab
81. paraphernalia.ti,ab
82. (treatment\$ adj2 entry).ti,ab
83. (treatment\$ adj2 enter\$).ti,ab

- 84. (abstin\$ or abstain\$).ti,ab
- 85. drug\$.ti,ab
- 86. substance.ti,ab
- 87. (idu or idus or ivdu or ivdus).ti,ab
- 88. ((behavior\$ or behaviour\$ or activit\$ or access\$ or utiliz\$ or use\$ or using\$ or test\$ or risk\$ or outcome\$) adj4 (reduc\$ or declin\$ or chang\$ or effect\$ or increas\$ or decreas\$ or impact\$ or modif\$ or lower\$ or maintain\$ or maintenance)).ti,ab
- 89. bleach\$.ti,ab
- 90. clean\$.ti,ab
- 91. condom\$.ti,ab
- 92. contracept\$.ti,ab
- 93. crack\$.ti,ab
- 94. disclos\$.ti,ab
- 95. incidence.ti,ab
- 96. inject\$.ti,ab
- 97. intention\$.ti,ab
- 98. intercourse.ti,ab
- 99. needle\$.ti,ab
- 100. infect\$ adj4 (new\$ or rate\$ or declin\$ or reduc\$ or prevent\$ or lower\$ or decreas\$).ti,ab
- 101. partner\$.ti,ab
- 102. seroconver\$.ti,ab
- 103. sex\$.ti,ab

- 104. syring\$.ti,ab
- 105. test\$.ti,ab
- 106. or/55-105
- 107. 8 and 54 and 106

### **Key**

\$ = truncation

\* = focus

ab = abstract

ti = title

/ut = utilization subheading

/pc = prevention and control subheading

### **Limits**

No Language Limits Applied

Publication Limits: Clinical Trial, Controlled Clinical Trial, Corrected and Republished Article, Evaluation Studies, Journal Article, Meta-Analysis, Multicenter Study, Published Erratum, Randomized Controlled Trial, Retraction of Publication, Review, Review Literature, Technical Report, Validation Studies

## Supplementary Material C: MEDLINE search strategy (in OVID)

### Appendix b: Medication Adherence (MA) Search

#### HIV/AIDS MeSH and Keywords

1. HIV Infections/
2. AIDS/
3. HIV Seropositivity/
4. (living adj4 (hiv or aids)).ti,ab
5. HIV positiv\$.ti,ab
6. HIV infected.ti,ab
7. or/1-6

#### Intervention MeSH and Keywords

8. Intervention Studies/
9. Case management/
10. Directly Observed Therapy/
11. intervention\$.ti,ab
12. (therapy or therapies).ti,ab
13. (treatment or treatments).ti,ab
14. medication event monitor\$.ti,ab
15. mems.ti,ab
16. modified directly observed.ti,ab
17. mdot.ti,ab
18. directly administered.ti,ab
19. daart.ti,ab
20. directly observed therapy.ti,ab
21. dot.ti,ab
22. or/8-21

#### HAART MeSH and Keywords

23. Anti-HIV agents/
24. Anti-Retroviral Agents/
25. Antiviral Agents/
26. Antiretroviral Therapy, Highly Active/
27. haart.ti,ab
28. arv.ti,ab
29. art.ti,ab
30. antiretroviral\$.ti,ab
31. anti retroviral\$.ti,ab
32. antiviral\$.ti,ab
33. anti viral\$.ti,ab
34. (medication or medications).ti,ab
35. or/23-34

#### Adherence MeSH and Keywords

36. Patient Compliance/
37. Medication Adherence/
38. adher\$.ti,ab
39. nonadher\$.ti,ab
40. non adher\$.ti,ab
41. complian\$.ti,ab
42. non complian\$.ti,ab
43. noncomplian\$.ti,ab
44. viral load.ti,ab
45. (cd4 adj2 (count or counts)).ti,ab
46. or/36-45
47. 7 and 22 and 35 and 46

#### Limits

No Language Limits Applied

Publication Limits: Clinical Trial, Controlled Clinical Trial, Corrected and Republished Article, Evaluation Studies, Journal Article, Meta-Analysis, Multicenter Study, Published Erratum, Randomized Controlled Trial, Retraction of Publication, Review, Review Literature, Technical Report, Validation Studies

#### Key:

/ = Index Term  
\$ = truncation  
ab = abstract  
ti = title  
adj2 = within 2 words  
adj4 = within 4 words

## Supplementary Material C: MEDLINE search strategy (in OVID)

### Appendix c: Linkage to, Retention in, and Re-engagement in Care (LRC) Search

#### HIV POSITIVE PERSON MESH AND KEYWORDS

1. HIV infections/co, dt, di, nu, pc, px, th, tm
2. HIV infect\$.ti,ab
3. (HIV adj4 diagnos\$).ti,ab
4. HIV positiv\$.ti,ab
5. (HIV adj4 care).ti,ab
6. (HIV adj4 treatment\$).ti,ab
7. living with HIV.ti,ab
8. or/1-7

#### LINKING AND RETENTION IN CARE MESH AND KEYWORDS

9. (access\$ adj4 care).ti,ab
10. (access\$ adj4 barrier\$).ti,ab
11. (access\$ adj4 (treatment or service\$)).ti,ab
12. (barrier\$ adj4 care).ti,ab
13. case management.ti,ab
14. case manager\$.ti,ab
15. (decreas\$ adj4 barrier\$).ti,ab
16. (engag\$ adj4 (care or service\$)).ti,ab
17. (enroll\$ adj4 care).ti,ab
18. ((enter\$ or entry) adj4 care).ti,ab
19. ((enter\$ or entry) adj4 service\$).ti,ab
20. (improv\$ adj4 access\$).ti,ab
21. (improv\$ adj4 retention).ti,ab
22. ((kept or keep\$ or return\$) adj4 appointment\$).ti,ab
23. (link\$ adj4 (retain\$ or retent\$)).ti,ab
24. (link\$ adj4 care).ti,ab
25. (link\$ adj4 case).ti,ab
26. (link\$ adj4 treatment).ti,ab
27. (link\$ adj4 service\$).ti,ab
28. (outreach adj4 (care or link\$ or program\$)).ti,ab
29. ((provision or provid\$) adj4 (care or service\$)).ti,ab
30. (reduc\$ adj4 barrier\$).ti,ab

31. ((re engag\$ or reengag\$) adj4 (care or treatment or service\$)).ti,ab
32. ((re enter\$ or reenter\$) adj4 (care or treatment or service\$)).ti,ab
33. ((refer or refers or referred or referral\$) adj4 (care or medical or treatment or clinic or service\$)).ti,ab
34. ((retain\$ or retent\$) adj4 care).ti,ab
35. (seek\$ adj4 (care or treatment\$)).ti,ab
36. (utiliz\$ adj4 (treatment or care or service\$)).ti,ab
37. (medical adj4 (care or treatment or service\$)).ti,ab
38. (gap\$ adj2 care).ti,ab
39. (visit adj2 (constan\$ or consist\$)).ti,ab
40. (appointment\$ adj2 adher\$).ti,ab
41. ((follow-up or follow up) adj2 discontin\$).ti,ab
42. ((miss\$ or schedul\$) adj2 (visit\$ or appointment\$)).ti,ab
43. (\$contin\$ adj2 care).ti,ab
44. or/9-43
45. 8 and 44

#### Limits

No Language Limits Applied

Publication Limits: Clinical Trial, Controlled Clinical Trial, Corrected and Republished Article, Evaluation Studies, Journal Article, Meta-Analysis, Multicenter Study, Published Erratum, Randomized Controlled Trial, Retraction of Publication, Review, Review Literature, Technical Report, Validation Studies

#### Key:

\$ = truncation

ab = abstract

ti = title

/co = complications

/dt = drug therapy

/di = diagnosis

/nu = nursing

/pc = prevention and control

/px = psychology

/th = therapy

/tm = transmission



## Supplementary Material C: MEDLINE search strategy (in VOID)

### Appendix d: Systematic Reviews of HIV Prevention Search

#### HIV/AIDS /STD MESH AND KEYWORDS

1. \*HIV infections/
2. \*AIDS/
3. \*Sexually transmitted diseases/
4. \*HIV Seropositivity/
5. \*AIDS Serodiagnosis/
6. HIV infect\$.ti,ab
7. HIV positiv\$.ti,ab
8. HIV care.ti,ab
9. (HIV adj4 incidence).ti,ab
10. (HIV adj4 prevent\$.ti,ab
11. (HIV adj4 risk\$.ti,ab
12. (HIV adj4 prevalen\$.ti,ab
13. (HIV adj4 new\$ infect\$.ti,ab
14. (HIV adj4 new\$ diagnos\$.ti,ab
15. (HIV adj4 transm\$.ti,ab
16. Sexually transmitted disease\$.ti,ab
17. Sexually transmitted infection\$.ti,ab
18. (STD or STDs or STI or STIs).ti,ab
19. (living adj4 HIV).ti,ab
20. (living adj4 (AIDS not hearing)).ti,ab
21. or/1-20

#### SYSTEMATIC REVIEW MESH AND KEYWORDS

22. Review/ OR Review.pt (Same Search)
23. Meta Analysis/ OR Meta-Analysis.pt
24. 22 OR 23
25. (MEDLINE or MEDLARS or EMBASE or PubMed or Cochrane).ab
26. (PsychINFO or PsycINFO).ab
27. (Sociofile or Sociological Abstracts).ab
28. CINAHL.ab
29. ((hand adj2 search\$) or (manual\$ adj2 search\$)).ab
30. ((electronic or bibliographic or computer\$ or online or automat\$) adj3 database\$.ab
31. or/25-30
32. 24 and 31

33. (meta-anal\$ or meta anal\$ or metaanal\$).ti,ab
34. (systematic\$ adj4 review\$).ti,ab
35. (systematic\$ adj4 overview\$).ti,ab
36. (systematic\$ adj4 synthes\$).ti,ab
37. literature review.ti,ab
38. (literature\$ adj4 overview\$).ti,ab
39. (literature\$ adj4 synthes\$).ti,ab
40. (quantitativ\$ adj4 review\$).ti,ab
41. (quantitativ\$ adj4 overview\$).ti,ab
42. (quantitativ\$ adj4 synthes\$).ti,ab
43. (qualitative\$ adj4 review\$).ti,ab
44. (qualitative\$ adj4 overview\$).ti,ab
45. (qualitative\$ adj4 synthes\$).ti,ab
46. (methodolog\$ adj4 review\$).ti,ab
47. (methodolog\$ adj4 overview\$).ti,ab
48. (methodolog\$ adj4 synthes\$).ti,ab
49. (review\$ adj4 article\$).ti,ab
50. (review\$ adj4 (study or studies)).ti,ab
51. (review\$ adj4 evidence).ti,ab
52. (review\$ adj4 updat\$).ti,ab
53. (review\$ adj4 (analy\$ or anali\$)).ti,ab
54. (research adj4 review\$).ti,ab
55. (research adj4 overview\$).ti,ab
56. (research adj4 synthes\$).ti,ab
57. or/33-56
58. 32 or 57
59. 21 and 58

#### Limits

No Language Limits Applied

Publication Limits: Clinical Trial, Controlled Clinical Trial, Corrected and Republished Article, Evaluation Studies, Journal Article, Meta-Analysis, Multicenter Study, Published Erratum, Randomized Controlled Trial, Retraction of Publication, Review, Review Literature, Technical Report, Validation Studies

#### Key

\* = focus MeSH term  
adj = adjacency search  
ti = title  
pt = publication type  
ab = abstract  
/ = MeSH term  
\$ = truncation

**Supplementary Material D: List of 60 journals used in manual search**

1. Academic Emergency Medicine
2. Addiction
3. African Journal of AIDS Research
4. AIDS
5. AIDS and Behavior
6. AIDS Care
7. AIDS Education and Prevention
8. AIDS Patient Care and STDs
9. AIDS Reviews
10. American Journal of Drug and Alcohol Abuse
11. American Journal of Preventive Medicine
12. American Journal of Public Health
13. Annals of Behavioral Medicine
14. Annals of Pharmacotherapy
15. Antiviral Therapy
16. BMC Health Services Research
17. BMC Infectious Diseases
18. BMC Public Health
19. BMJ
20. Clinical Infectious Diseases
21. Cochrane Database of Systematic Reviews
22. Cognitive and Behavioral Practice
23. Current HIV/AIDS Reports
24. Current Opinion in HIV and AIDS
25. Drug and Alcohol Dependence
26. Evaluation and Program Planning
27. Health Education & Behavior
28. Health Education Research
29. Health Psychology
30. HIV Medicine
31. International Journal of STD & AIDS
32. JAIDS Journal of Acquired Immune Deficiency Syndromes
33. JAMA Journal of the American Medical Association
34. JAMA Pediatrics
35. Journal of Adolescent Health
36. Journal of Consulting and Clinical Psychology
37. Journal of General Internal Medicine
38. Journal of Health Care for the Poor & Underserved
39. Journal of Health Communication
40. Journal of HIV/AIDS & Social Sciences
41. Journal of Sexually Transmitted Diseases
42. Journal of Substance Abuse Treatment
43. Journal of the Association of Nurses in AIDS Care
44. Journal of the International AIDS Society
45. Journal of the International Association of Physicians in AIDS Care
46. Journal of Urban Health
47. Lancet
48. Lancet Infectious Diseases
49. Morbidity and Mortality Weekly Report
50. Patient Education and Counseling
51. Perspectives on Sexual & Reproductive Health
52. PLoS Medicine
53. PLoS ONE
54. Psychology, Health & Medicine
55. Public Health Reports
56. Sexual Health
57. Sexually Transmitted Diseases
58. Sexually Transmitted Infections
59. Substance Use & Misuse
60. Tropical Medicine & International Health

## Supplementary Material E: List of 133 studies excluded from the systematic review and meta-analysis

*130 studies address and evaluate only one of the following topics: transmission risk, HIV care engagement, HIV medication adherence, and viral suppression*

Altice FL, Maru DS, Bruce RD, Springer SA, Friedland GH. Superiority of directly administered antiretroviral therapy over self-administered therapy among HIV-infected drug users: a prospective, randomized, controlled trial. *Clin Infect Dis* 2007; **45**:770-778.

Andersen M, Tinsley J, Milfort D, Wilcox R, Smereck G, Pfoutz S, *et al.* HIV health care access issues for women living with HIV, mental illness, and substance abuse. *AIDS Patient Care STDS* 2005; **19**:449-459.

Andrade AS, McGruder HF, Wu AW, Celano SA, Skolasky RL, Jr., Selnes OA, *et al.* A programmable prompting device improves adherence to highly active antiretroviral therapy in HIV-infected subjects with memory impairment. *Clin Infect Dis* 2005; **41**:875-882.

Antoni MH, Carrico AW, Duran RE, Spitzer S, Penedo F, Ironson G, *et al.* Randomized clinical trial of cognitive behavioral stress management on human immunodeficiency virus viral load in gay men treated with highly active antiretroviral therapy. *Psychosom Med* 2006; **68**:143-151.

Belzer ME, Naar-King S, Olson J, Sarr M, Thornton S, Kahana SY, *et al.* The use of cell phone support for non-adherent HIV-infected youth and young adults: an initial randomized and controlled intervention trial. *AIDS Behav* 2014; **18**:686-696.

Berg KM, Litwin A, Li X, Heo M, Arnsten JH. Directly observed antiretroviral therapy improves adherence and viral load in drug users attending methadone maintenance clinics: a randomized controlled trial. *Drug Alcohol Depend* 2011; **113**:192-199.

Berrien VM, Salazar JC, Reynolds E, McKay K, HIV Medication Adherence Intervention Group. Adherence to antiretroviral therapy in HIV-infected pediatric patients improves with home-based intensive nursing intervention. *AIDS Patient Care STDS* 2004; **18**:355-363.

Bindman AB, Osmond D, Hecht FM, Lehman S, Vranizan K, Keane D, *et al.* Multistate evaluation of anonymous of HIV testing and access to medical care. *JAMA* 1998; **280**:1416-1420.

Blank MB, Hanrahan NP, Fishbein M, Wu ES, Tennille JA, Ten Have TR, *et al.* A randomized trial of a nursing intervention for HIV disease management among persons with serious mental illness. *Psychiatr Serv* 2011; **62**:1318-1324.

Claborn KR, Leffingwell TR, Miller MB, Meier E, Stephens JR. Pilot study examining the efficacy of an electronic intervention to promote HIV medication adherence. *AIDS Care* 2014; **26**:404-409.

Cleary PD, Van Devanter N, Steilen M, Stuart A, Shipton-Levy R, McMullen W, *et al.* A randomized trial of an education and support program for HIV-infected individuals. *AIDS* 1995; **9**:1271-1278.

Coates TJ, McKusick L, Kuno R, Stites DP. Stress reduction training changed number of sexual partners but not immune function in men with HIV. *Am J Public Health* 1989; **79**:885-887.

Coleman CL, Jemmott L, Jemmott JB, Strumpf N, Ratcliffe S. Development of an HIV risk reduction intervention for older seropositive African American men. *AIDS Patient Care STDS* 2009; **23**:647-655.

Cosio D, Heckman TG, Anderson T, Heckman BD, Garske J, McCarthy J. Telephone-administered motivational interviewing to reduce risky sexual behavior in HIV-infected rural persons: a pilot randomized clinical trial. *Sex Transm Dis* 2010; **37**:140-146.

DiIorio C, Resnicow K, McDonnell M, Soet J, McCarty F, Yeager K. Using motivational interviewing to promote adherence to antiretroviral medications: a pilot study. *J Assoc Nurses AIDS Care* 2003; **14**:52-62.

DiIorio C, McCarty F, Resnicow K, McDonnell Holstad M, Soet J, Yeager K, *et al.* Using motivational interviewing to promote adherence to antiretroviral medications: a randomized controlled study. *AIDS Care* 2008; **20**:273-283.

Duncan LG, Moskowitz JT, Neilands TB, Dilworth SE, Hecht FM, Johnson MO. Mindfulness-based stress reduction for HIV treatment side effects: a randomized wait-list controlled trial. *J Pain Symptom Manage* 2011; **43**:161-171.

Enriquez M, Cheng AL, McKinsey DS, Stanford J. Development and efficacy of an intervention to enhance readiness for adherence among adults who had previously failed HIV treatment. *AIDS Patient Care STDS* 2009; **23**:177-184.

Feaster DJ, Mitrani VB, Burns MJ, McCabe BE, Brincks AM, Rodriguez AE, *et al.* A randomized controlled trial of Structural Ecosystems Therapy for HIV medication adherence and substance abuse relapse prevention. *Drug Alcohol Depend* 2010; **111**:227-234.

Fisher JD, Fisher WA, Cornman DH, Amico RK, Bryan A, Friedland G. Clinician initiated intervention delivered during routine clinical care reduces risky sexual behavior of HIV+ patients. *J Acquir Immune Defic Syndr* 2006; **41**:44-52.

Fisher JD, Amico KR, Fisher WA, Cornman DH, Shuper PA, Trayling C, *et al.* Computer-based intervention in HIV clinical care setting improves antiretroviral adherence: the LifeWindows Project. *AIDS Behav* 2011; **15**:1635-1643.

Freedberg KA, Hirschhorn LR, Schackman BR, Wolf LL, Martin LA, Weinstein MC, *et al.* Cost-effectiveness of an intervention to improve adherence to antiretroviral therapy in HIV-infected patients. *J Acquir Immune Defic Syndr* 2006; **43(Suppl 2)**:S113-S118.

Gardner LI, Metsch LR, Anderson-Mahoney P, Loughlin AM, Rio CD, Strathdee S, *et al.* Efficacy of a brief case management intervention to link recently diagnosed HIV-infected persons to care. *AIDS* 2005; **19**:423-431.

Gilbert P, Ciccarone D, Gansky SA, Bangsberg DR, Clanon K, McPhee SJ, *et al.* Interactive "Video Doctor" counseling reduces drug and sexual risk behaviors among HIV-positive patients in diverse outpatient settings. *PLoS ONE* 2008; **3**:e1988.

Goggin K, Gerkovich MM, Williams KB, Banderas JW, Catley D, Berkley-Patton J, *et al.* A randomized controlled trial examining the efficacy of motivational counseling with observed therapy for antiretroviral therapy adherence. *AIDS Behav* 2013; **17**:1992-2001.

Golin CE, Earp J, Tien HC, Stewart P, Porter C, Howie L. A 2-arm, randomized, controlled trial of a motivational interviewing-based intervention to improve adherence to antiretroviral therapy (ART) among patients failing or initiating ART. *J Acquir Immune Defic Syndr* 2006; **42**:42-51.

Golin CE, Earp JA, Grodensky CA, Patel SN, Suchindran C, Parikh M, *et al.* Longitudinal effects of SafeTalk, a motivational interviewing-based program to improve safer sex practices among people living with HIV/AIDS. *AIDS Behav* 2012; **16**:1182-1191.

Grella CE, Anglin MD, Rawson R, Crowley R, Hasson A. What happens when a demonstration project ends: consequences for a clinic and its clients. *J Subst Abuse Treat* 1996; **13**:249-256.

Gross R, Bellamy SL, Chapman J, Han X, O'Duor J, Palmer SC, *et al.* Managed problem solving for antiretroviral therapy adherence: a randomized trial. *JAMA Intern Med* 2013; **173**:300-306.

Gustafson DH, Hawkins R, Boberg E, Pingree S, Serlin RE, Graziano F, *et al.* Impact of a patient-centered, computer-based health information/support system. *Am J Prev Med* 1999; **16**:1-9.

Hardy H, Kumar V, Doros G, Farmer E, Drainoni ML, Rybin D, *et al.* Randomized controlled trial of a personalized cellular phone reminder system to enhance adherence to antiretroviral therapy. *AIDS Patient Care STDS* 2011; **25**:153-161.

Henry SR, Goetz MB, Asch SM. The effect of automated telephone appointment reminders on HIV primary care no-shows by veterans. *J Assoc Nurses AIDS Care* 2012; **23**:409-418.

Hersch RK, Cook RF, Billings DW, Kaplan S, Murray D, Safren S, *et al.* Test of a web-based program to improve adherence to HIV medications. *AIDS Behav* 2013; **17**:2963-2976.

Himelhoch S, Medoff D, Maxfield J, Dihmes S, Dixon L, Robinson C, *et al.* Telephone based cognitive behavioral therapy targeting major depression among urban dwelling, low income people living with HIV/AIDS: results of a randomized controlled trial. *AIDS Behav* 2013; **17**:2756-2764.

Holstad M, Ofotokun I, Higgins M, Logwood S. The LIVE network: A music-based messaging program to promote ART adherence self-management. *AIDS Behav* 2013; **17**:2954-2962.

Holzemer WL, Bakken S, Portillo CJ, Grimes R, Welch J, Wantland D, *et al.* Testing a nurse-tailored HIV medication adherence intervention. *Nurs Res* 2006; **55**:189-197.

Horvath KJ, Michael Oakes J, Rosser BRS, Danilenko G, Vezina H, Rivet Amico K, *et al.* Feasibility, acceptability and preliminary efficacy of an online peer-to-peer social support ART adherence intervention. *AIDS Behav* 2013; **17**:2031-2044.

Illa L, Echenique M, Saint-Jean G, Bustamante-Avellaneda V, Metsch L, Mendez-Mulet L, *et al.* Project ROADMAP: Reeducating Older Adults in Maintaining AIDS Prevention: a secondary intervention for older HIV-positive adults. *AIDS Educ Prev* 2010; **22**:138-147.

Ingersoll KS, Farrell-Carnahan L, Cohen-Filipic J, Heckman CJ, Ceperich SD, Hettema J, *et al.* A pilot randomized clinical trial of two medication adherence and drug use interventions for HIV+ crack cocaine users. *Drug Alcohol Depend* 2011; **116**:177-187.

Javanbakht M, Prosser P, Grimes T, Weinstein M, Farthing C. Efficacy of an individualized adherence support program with contingent reinforcement among nonadherent HIV-positive patients: results from a randomized trial. *J Int Assoc Physicians AIDS Care* 2006; **5**:143-150.

Johnson MO, Dilworth SE, Taylor JM, Neilands TB. Improving coping skills for self-management of treatment side effects can reduce antiretroviral medication nonadherence among people living with HIV. *Ann Behav Med* 2011; **41**:83-91.

Jones DL, Weiss SM, Malow R, Ishii M, Devieux J, Stanley H, *et al.* A brief sexual barrier intervention for women living with AIDS: acceptability, use, and ethnicity. *J Urban Health* 2001; **78**:593-604.

Jones DL, Ishii M, LaPerriere A, Stanley H, Antoni M, Ironson G, *et al.* Influencing medication adherence among women with AIDS. *AIDS Care* 2003; **15**:463-474.

Jones DL, McPherson-Baker S, Lydston D, Camille J, Brondolo E, Tobin JN, *et al.* Efficacy of a group medication adherence intervention among HIV positive women: the SMART/EST Women's Project. *AIDS Behav* 2007; **11**:79-86.

Jones DL, Kashy D, Villar-Loubet OM, Cook R, Weiss SM. The impact of substance use, sexual trauma, and intimate partner violence on sexual risk intervention outcomes in couples: a randomized trial. *Ann Behav Med* 2013; **45**:318-328.

Kalichman SC, Rompa D, Cage M, DiFonzo K, Simpson D, Austin J, *et al.* Effectiveness of an intervention to reduce HIV transmission of risks in HIV-positive people. *Am J Prev Med* 2001; **21**:84-92.

Kalichman SC, Kalichman MO, Cherry C, Swetzes C, Amaral CM, White D, *et al.* Brief behavioral self-regulation counseling for HIV treatment adherence delivered by cell phone: an initial test of concept trial. *AIDS Patient Care STDS* 2011; **25**:303-310.

Kalichman SC, Cherry C, Kalichman MO, Amaral C, White D, Grebler T, *et al.* Randomized clinical trial of HIV treatment adherence counseling interventions for people living with HIV and limited health literacy. *J Acquir Immune Defic Syndr* 2013; **63**:42-50.

Keitz SA, Box TL, Homan RK, Bartlett JA, Oddone EZ. Primary care for patients infected with human immunodeficiency virus: a randomized controlled trial. *J Gen Intern Med* 2001; **16**:573-582.

Keller S, Jones J, Erbeding E. Choice of rapid HIV testing and entrance into care in Baltimore City sexually transmitted infections clinics. *AIDS Patient Care STDS* 2011; **25**:237-243.

Kelly JA, Murphy DA, Bahr GR, Kalichman SC, Morgan MG, Stevenson Y, *et al.* Outcome of cognitive-behavioral and support group brief therapies for depressed, HIV-infected persons. *Am J Psychiatry* 1993; **150**:1679-1686.

Kennard BD, Brown LT, Hawkins L, Risi A, Radcliffe J, Emslie G, *et al.* Development and implementation of health and wellness CBT for individuals with depression and HIV. *Cogn Behav Pract* 2014; **21**:237-246.

Kenya S, Jones J, Arheart K, Kobetz E, Chida N, Baer S, *et al.* Using community health workers to improve clinical outcomes among people living with HIV: a randomized controlled trial. *AIDS Behav* 2013; **17**:2927-2934.

Klein C, Lomonaco C, Pavlescak R, Card J. WiLLOW: reaching HIV-positive African-American women through a computer-delivered intervention. *AIDS Behav* 2013; **17**:3013-3023.

Koenig LJ, Pals SL, Bush T, Pratt Palmore M, Stratford D, Ellerbrock TV. Randomized controlled trial of an intervention to prevent adherence failure among HIV-infected patients initiating antiretroviral therapy. *Health Psychol* 2008; **27**:159-169.

Lapinski MK, Randall LM, Peterson M, Peterson A, Klein KA. Prevention options for positives: the effects of a health communication intervention for men who have sex with men living with HIV/AIDS. *Health Commun* 2009; **24**:562-571.

Letourneau EJ, Ellis DA, Naar-King S, Chapman JE, Cunningham PB, Fowler S. Multisystemic therapy for poorly adherent youth with HIV: results from a pilot randomized controlled trial. *AIDS Care* 2013; **25**:507-514.

Levin TR, Klibanov OM, Axelrod P, Berg-Wolf M, Finley GL, Gray A, *et al.* A randomized trial of educational materials, pillboxes, and mailings to improve adherence with antiretroviral therapy in an Inner City HIV clinic. *J Clin Outcomes Manag* 2006; **13**:217-221.

Lightfoot M, Rotheram-Borus MJ, Comulada WS, Reddy VS, Duan N. Efficacy of brief interventions in clinical care settings for persons living with HIV. *J Acquir Immune Defic Syndr* 2010; **53**:348-356.

Lovejoy TI, Heckman TG, Suhr JA, Anderson T, Heckman BD, France CR. Telephone-administered motivational interviewing reduces risky sexual behavior in HIV-positive late middle-age and older adults: a pilot randomized controlled trial. *AIDS Behav* 2011; **15**:1623-1634.

Lucas GM, Mullen BA, Weidle PJ, Hader S, McCaul ME, Moore RD. Directly administered antiretroviral therapy in methadone clinics is associated with improved HIV treatment outcomes, compared with outcomes among concurrent comparison groups. *Clin Infect Dis* 2006; **42**:1628-1635.

Lucas GM, Chaudhry A, Hsu J, Woodson T, Lau B, Olsen Y, *et al.* Clinic-based treatment of opioid-dependent HIV-infected patients versus referral to an opioid treatment program: A randomized trial. *Ann Intern Med* 2010; **152**:704-711.

Lucas GM, Mullen BA, Galai N, Moore RD, Cook K, McCaul ME, *et al.* Directly administered antiretroviral therapy for HIV-infected individuals in opioid treatment programs: results from a randomized clinical trial. *PLoS ONE* 2013; **8**:e68286.

Macalino GE, Hogan JW, Mitty JA, Bazerman LB, DeLong AK, Loewenthal H, *et al.* A randomized clinical trial of community-based directly observed therapy as an adherence intervention for HAART among substance users. *AIDS* 2007; **21**:1473-1477.

- Magnus M, Herwehe J, Gruber D, Wilbright W, Shepard E, Abrams A, *et al.* Improved HIV-related outcomes associated with implementation of a novel public health information exchange. *Int J Med Inf* 2012; **81**:e30-e38.
- Mann T. Effects of future writing and optimism on health behaviors in HIV-infected women. *Ann Behav Med* 2001; **23**:26-33.
- Mannheimer SB, Morse E, Matts JP, Andrews L, Child C, Schmetter B, *et al.* Sustained benefit from a long-term antiretroviral adherence intervention: results of a large randomized clinical trial. *J Acquir Immune Defic Syndr* 2006; **43**:S41-S47.
- Margolin A, Schuman-Olivier Z, Beitel M, Arnold RM, Fulwiler CE, Avants SK. A preliminary study of spiritual self-schema (3-S+) therapy for reducing impulsivity in HIV-positive drug users. *J Clin Psychol* 2007; **63**:979-999.
- Marhefka SL, Bui ER, Baldwin J, Chen H, Johnson A, Lynn V, *et al.* Effectiveness of Healthy Relationships Video-Group - a videoconferencing group intervention for women living with HIV: preliminary findings from a randomized controlled trial. *Telemed J E Health* 2014; **20**:128-134.
- Mausbach BT, Semple SJ, Strathdee SA, Zians J, Patterson TL. Efficacy of a behavioral intervention for increasing safer sex behaviors in HIV-positive MSM methamphetamine users: results from the EDGE study. *Drug Alcohol Depend* 2007; **87**:249-257.
- McKirnan DJ, Tolou-Shams M, Courtenay-Quirk C. The Treatment Advocacy Program: a randomized controlled trial of a peer-led safer sex intervention for HIV-infected men who have sex with men. *J Consult Clin Psychol* 2010; **78**:952-963.
- McPherson-Baker S, Malow RM, Penedo F, Jones DL, Schneiderman N, Klimas NG. Enhancing adherence to combination antiretroviral therapy in non-adherent HIV-positive men. *AIDS Care* 2000; **12**:399-404.
- Murphy DA, Lu MC, Martin D, Hoffman D, Marelich WD. Results of a pilot intervention trial to improve antiretroviral adherence among HIV-positive patients. *J Assoc Nurses AIDS Care* 2002; **13**:57-69.
- Murphy DA, Marelich WD, Rappaport NB, Hoffman D, Farthing C. Results of an antiretroviral adherence intervention: STAR (Staying Healthy: Taking Antiretrovirals Regularly). *J Int Assoc Physicians AIDS Care* 2007; **6**:113-124.
- Naar-King S, Outlaw A, Green-Jones M, Wright K, Parsons JT. Motivational interviewing by peer outreach workers: a pilot randomized clinical trial to retain adolescents and young adults in HIV care. *AIDS Care* 2009; **21**:868-873.
- Naar-King S, Outlaw AY, Sarr M, Parsons JT, Belzer M, Macdonell K, *et al.* Motivational Enhancement System for Adherence (MESA): pilot randomized trial of a brief computer-delivered prevention intervention for youth initiating antiretroviral treatment. *J Pediatr Psychol* 2013; **38**:638-648.



Parsons JT, Golub SA, Rosof E, Holder C. Motivational interviewing and cognitive-behavioral intervention to improve HIV medication adherence among hazardous drinkers: a randomized controlled trial. *J Acquir Immune Defic Syndr* 2007; **46**:443-450.

Patterson TL, Shaw WS, Semple SJ. Reducing the sexual risk behaviors of HIV+ individuals: outcome of a randomized controlled trial. *Ann Behav Med* 2003; **25**:137-145.

Petry NM, Weinstock J, Alessi SM, Lewis MW, Dieckhaus K. Group-based randomized trial of contingencies for health and abstinence in HIV patients. *J Consult Clin Psychol* 2010; **78**:89-97.

Rathbun RC, Farmer KC, Stephens JR, Lockhart SM. Impact of an adherence clinic on behavioral outcomes and virologic response in treatment of HIV infection: a prospective, randomized, controlled pilot study. *Clin Ther* 2005; **7**:199-209.

Rawlings MK, Thompson MA, Farthing CF, Brown LS, Racine J, Scott RC, *et al*. Impact of an educational program on efficacy and adherence with a twice-daily Lamivudine/Zidovudine/Abacavir regimen in underrepresented HIV-infected patients. *J Acquir Immune Defic Syndr* 2003; **34**:174-183.

Remien RH, Stirratt MJ, Dolezal C, Dognin JS, Wagner GJ, Carballo-Diequez A, *et al*. Couple-focused support to improve HIV medication adherence: a randomized controlled trial. *AIDS* 2005; **19**:807-814.

Reynolds NR, Testa MA, Su M, Chesney MA, Neidig JL, Frank I, *et al*. Telephone support to improve antiretroviral medication adherence: a multisite, randomized controlled trial. *J Acquir Immune Defic Syndr* 2008; **47**:62-68.

Richardson JL, Milam J, McCutchan A, Stoyanoff S, Bolan R, Weiss J, *et al*. Effect of brief safer-sex counseling by medical providers to HIV-1 seropositive patients: a multi-clinic assessment. *AIDS* 2004; **18**:1179-1186.

Rigsby MO, Rosen MI, Beauvais JE, Cramer JA, Rainey PM, O'Malley SS, *et al*. Cue-dose training with monetary reinforcement: pilot study of an antiretroviral adherence intervention. *J Gen Intern Med* 2000; **15**:841-847.

Robbins GK, Lester W, Johnson KL, Chang Y, Estey G, Surrao D, *et al*. Efficacy of a clinical decision-support system in an HIV practice: a randomized trial. *Ann Intern Med* 2012; **157**:757-766.

Robbins GK, Testa MA, Su M, Safren SA, Morse G, Lammert S, *et al*. Site nurse-initiated adherence and symptom support telephone calls for HIV-positive individuals starting antiretroviral therapy, ACTG 5031: substudy of ACTG 384. *HIV Clinical Trials* 2013; **14**:235-253.

Rose CD, Courtenay-Quirk C, Knight K, Shade SB, Vittinghoff E, Gomez C, *et al*. HIV Intervention for Providers Study: a randomized controlled trial of a clinician-delivered HIV risk-reduction intervention for HIV-positive people. *J Acquir Immune Defic Syndr* 2010; **55**:572-581.

Rosen MI, Dieckhaus K, McMahon TJ, Valdes B, Petry NM, Cramer J, *et al*. Improved adherence with contingency management. *AIDS Patient Care STDS* 2007; **21**:30-40.

Rosenberg SD, Goldberg RW, Dixon LB, Wolford GL, Slade EP, Himelhoch S, *et al.* Assessing the STIRR model of best practices for blood-borne infections of clients with severe mental illness. *Psychiatr Serv* 2010; **61**:885-891.

Rosser BRS, Hatfield LA, Miner MH, Ghiselli ME, Lee BR, Welles SL, *et al.* Effects of a behavioral intervention to reduce serodiscordant unsafe sex among HIV positive men who have sex with men: the Positive Connections randomized controlled trial study. *J Behav Med* 2010; **33**:147-158.

Roth AM, Holmes AM, Stump TE, Aalsma MC, Ackermann RT, Carney TS, *et al.* Can lay health workers promote better medical self-management by persons living with HIV? An evaluation of the Positive Choices program. *Patient Educ Couns* 2012; **89**:184-190.

Rotheram-Borus MJ, Rice E, Comulada WS, Best K, Elia C, Peters K, *et al.* Intervention outcomes among HIV-affected families over 18 months. *AIDS Behav* 2012; **16**:1265-1275.

Sacks S, Banks S, McKendrick K, Sacks JY. Modified therapeutic community for co-occurring disorders: a summary of four studies. *J Subst Abuse Treat* 2008; **34**:112-122.

Safren SA, Otto MW, Worth JL, Salomon E, Johnson W, Mayer K, *et al.* Two strategies to increase adherence to HIV antiretroviral medication: Life-Steps and medication monitoring. *Behav Res Ther* 2001; **39**:1151-1162.

Safren SA, Hendriksen ES, Desousa N, Boswell SL, Mayer KH. Use of an on-line pager system to increase adherence to antiretroviral medications. *AIDS Care* 2003; **15**:787-793.

Safren SA, O'Cleirigh C, Tan JY, Raminani SR, Reilly LC, Otto MW, *et al.* A randomized controlled trial of cognitive behavioral therapy for adherence and depression (CBT-AD) in HIV-infected individuals. *Health Psychol* 2009; **28**:1-10.

Safren SA, O'Cleirigh CM, Bullis JR, Otto MW, Stein MD, Pollack MH. Cognitive behavioral therapy for adherence and depression (CBT-AD) in HIV-infected injection drug users: a randomized controlled trial. *J Consult Clin Psychol* 2012; **80**:404-415.

Safren SA, O'Cleirigh CM, Skeer M, Elsesser SA, Mayer KH. Project Enhance: A randomized controlled trial of an individualized HIV prevention intervention for HIV-infected men who have sex with men conducted in a primary care setting. *Health Psychol* 2013; **32**:171-179.

Samet JH, Horton NJ, Meli S, Dukes K, Tripps T, Sullivan L, *et al.* A randomized controlled trial to enhance antiretroviral therapy adherence in patients with a history of alcohol problems. *Antiviral Therapy* 2005; **10**:83-93.

Schull MJ, Cornick R, Thompson S, Faris G, Fairall L, Burciul B, *et al.* From PALS PLUS to PALM PLUS: adapting and developing a South African guideline and training intervention to better integrate HIV/AIDS care with primary care in rural health centers in Malawi. *Implement Sci* 2011; **6**:82.

Schwarcz SK, Chen YH, Murphy JL, Paul JP, Skinta MD, Scheer S, *et al.* A randomized control trial of personalized cognitive counseling to reduce sexual risk among HIV-infected men who have sex with men. *AIDS Care* 2013; **25**:1-10.

Sikkema KJ, Wilson PA, Hansen NB, Kochman A, Neufeld S, Ghebremichael MS, *et al.* Effects of a coping intervention on transmission risk behavior among people living with HIV/AIDS and a history of childhood sexual abuse. *J Acquir Immune Defic Syndr* 2008; **47**:506-513.

Sikkema KJ, Hansen NB, Kochman A, Santos J, Watt MH, Wilson PA, *et al.* The development and feasibility of a brief risk reduction intervention for newly HIV-diagnosed men who have sex with men. *J Community Psychol* 2011; **39**:717-732.

Sikkema KJ, Abler L, Hansen NB, Wilson PA, Drabkin AS, Kochman A, *et al.* Positive Choices: Outcomes of a brief risk reduction intervention for newly HIV-diagnosed men who have sex with men. *AIDS Behav* 2014; **18**:1808-1819.

Simoni J, Huh D, Frick PA, Pearson CR, Andrasik MP, Dunbar PJ, *et al.* Peer support and pager messaging to promote antiretroviral modifying therapy in Seattle: a randomized controlled trial. *J Acquir Immune Defic Syndr* 2009; **52**:465-473.

Simoni JM, Pantalone DW, Plummer MD, Huang B. A randomized controlled trial of a peer support intervention targeting antiretroviral medication adherence and depressive symptomatology in HIV-positive men and women. *Health Psychol* 2007; **26**:488-495.

Simoni JM, Wiebe JS, Saucedo JA, Huh D, Sanchez G, Longoria V, *et al.* A preliminary RCT of CBT-AD for adherence and depression among HIV-positive Latinos on the U.S.-Mexico border: the Nuevo Día Study. *AIDS Behav* 2013; **17**:2816-2829.

Smith SR, Rublein JC, Marcus C, Brock TP, Chesney MA. A medication self-management program to improve adherence to HIV therapy regimens. *Patient Educ Couns* 2003; **50**:187-199.

Sorensen JL, Dilley J, London J, Okin RL, Delucchi KL, Phibbs CS. Case management for substance abusers with HIV/AIDS: A randomized controlled trial. *Am J Drug Alcohol Abuse* 2003; **29**:133-150.

Sorensen JL, Haug NA, Delucchi KL, Gruber V, Kletter E, Batki SL, *et al.* Voucher reinforcement improves medication adherence in HIV-positive methadone patients: a randomized trial. *Drug Alcohol Depend* 2007; **88**:54-63.

Springer SA, Qiu J, Saber-Tehrani AS, Altice FL. Retention on buprenorphine is associated with high levels of maximal viral suppression among HIV-infected opioid dependent released prisoners. *PLoS ONE* 2012; **7**:e38335.

Surratt HL, O'Grady C, Kurtz SP, Levi-Minzi MA, Chen M. Outcomes of a behavioral intervention to reduce HIV risk among drug-involved female sex workers. *AIDS Behav* 2014; **18**:726-739.

Teti M, Bowleg L, Cole R, Lloyd L, Rubinstein S, Spencer S, *et al.* A mixed methods evaluation of the effect of the protect and respect intervention on the condom use and disclosure practices of women living with HIV/AIDS. *AIDS Behav* 2010; **14**:567-579.

Van Servellen G, Nyamathi A, Carpio F, Pearce D, Garcia-Teague L, Herrera G, *et al.* Effects of a treatment adherence enhancement program on health literacy, patient-provider relationships, and adherence to HAART among low-income HIV-positive Spanish-speaking Latinos. *AIDS Patient Care STDS* 2005; **19**:745-759.

Velasquez MM, von Sternberg K, Johnson DH, Green C, Carbonari JP, Parsons JT. Reducing sexual risk behaviors and alcohol use among HIV-positive men who have sex with men: a randomized clinical trial. *J Consult Clin Psychol* 2009; **77**:657-667.

Visnegarwala F, Rodriguez-Barradass MC, Graviss EA, Caprio M, Nykyforchyn M, Laufman L. Community outreach with weekly delivery of anti-retroviral drugs compared to cognitive-behavioural health care team-based approach to improve adherence among indigent women newly starting HAART. *AIDS Care* 2006; **18**:332-338.

Wagner G, Lovely P, Schneider S. Pilot controlled trial of the Adherence Readiness Program: an intervention to assess and sustain HIV antiretroviral adherence readiness. *AIDS Behav* 2013; **17**:3059-3065.

Wagner GJ, Kanouse DE, Golinelli D, Miller LG, Daar ES, Witt MD, *et al.* Cognitive-behavioral intervention to enhance adherence to antiretroviral therapy: a randomized controlled trial (CCTG 578). *AIDS* 2006; **20**:1295-1302.

Wanyenze RK, Hahn JA, Liechty CA, Ragland K, Ronald A, Mayanja-Kizza H, *et al.* Linkage to HIV care and survival following inpatient HIV counseling and testing. *AIDS Behav* 2011; **15**:751-760.

Webel AR. Testing a peer-based symptom management intervention for women living with HIV/AIDS. *AIDS Care* 2010; **22**:1029-1040.

Westling E, Garcia K, Mann T. Discovery of meaning and adherence to medications in HIV-infected women. *J Health Psychol* 2007; **12**:627-635.

Williams AB, Fennie KP, Bova CA, Burgess JD, Danvers KA, Dieckhaus KD. Home visits to improve adherence to highly active antiretroviral therapy: a randomized controlled trial. *J Acquir Immune Defic Syndr* 2006; **42**:314-321.

Williams JK, Wyatt GE, Rivkin I, Ramamurthi HC, Li X, Liu H. Risk reduction for HIV-positive African American and Latino men with histories of childhood sexual abuse. *Arch Sex Behav* 2008; **37**:763-772.

Williams JK, Glover DA, Wyatt GE, Kisler K, Liu H, Zhang M. A sexual risk and stress reduction intervention designed for HIV-positive bisexual African American men with childhood sexual abuse histories. *Am J Public Health* 2013; **103**:1476-1484.

Wilson IB, Barton Laws M, Safren SA, Lee Y, Lu M, Coady W, *et al.* Provider-focused intervention increases adherence-related dialogue but does not improve antiretroviral therapy adherence in persons with HIV. *J Acquir Immune Defic Syndr* 2010; **53**:338-347.

Wingood GM, DiClemente RJ, Mikhail I, Lang DL, McCree DH, Davies SL, *et al.* A randomized controlled trial to reduce HIV transmission risk behaviors and sexually transmitted diseases among women living with HIV: the WiLLOW Program. *J Acquir Immune Defic Syndr* 2004; **37(Suppl 2)**:S58-S67.

Wohl AR, Garland WH, Valencia R, Squires K, Witt MD, Kovacs A, *et al.* A randomized trial of directly administered antiretroviral therapy and adherence case management intervention. *Clin Infect Dis* 2006; **42**:1619-1627.

Wohl DA, Scheyett A, Golin CE, White B, Matuszewski J, Bowling M, *et al.* Intensive case management before and after prison release is no more effective than comprehensive pre-release discharge planning in linking HIV-infected prisoners to care: a randomized trial. *AIDS Behav* 2011; **15**:356-364.

Wolitski RJ, Gomez CA, Parson JT, SUMIT Study Team. Effects of a peer-led behavioral intervention to reduce HIV transmission and promote serostatus disclosure among HIV-seropositive gay and bisexual men. *AIDS* 2005; **19(Suppl 1)**:S99-S109

### ***3 integrated interventions are not randomized controlled trial***

Bogart LM, Wagner GJ, Mutchler MG, Risley B, McDavitt BW, McKay T, *et al.* Community HIV treatment advocacy programs may support treatment adherence. *AIDS Educ Prev* 2012; **24**:1-14.

Grinstead O, Zack B, Faigeles B. Reducing postrelease risk behavior among HIV seropositive prison inmates: the health promotion program. *AIDS Educ Prev* 2001; **13**:109-119.

Rotheram-Borus MJ, Lee MB, Murphy DA, Futterman D, Duan N, Birnbaum JM, *et al.* Efficacy of a preventive intervention for youths living with HIV. *Am J Public Health* 2001; **91**:400-405.

**Supplementary Material F: Risk of Bias Assessment (Study Level)**

| Author, Year                      | Participant Selection |                        | Blinding  |                   | Attrition |                                       |                  |                               |
|-----------------------------------|-----------------------|------------------------|-----------|-------------------|-----------|---------------------------------------|------------------|-------------------------------|
|                                   | Sequence Generation   | Allocation Concealment | Personnel | Outcome Assessors | ITT       | Differences between lost and retained | Retention (>80%) | Differential Attrition (<10%) |
| Holstad, 2011                     | ✓                     | ?                      | ?         | ✓                 | ?         | ?                                     | ✓                | ✓                             |
| Kalichman, 2011                   | ✓                     | ?                      | ?         | ✓                 | ?         | ✓                                     | ✓                | ✓                             |
| Konkle-Parker, 2012               | ?                     | ?                      | ?         | ✓                 | X         | ✓                                     | X                | ✓                             |
| Konkle-Parker, 2014               | ✓                     | ?                      | ?         | ✓                 | ?         | ?                                     | X                | ✓                             |
| Kurth, 2014                       | ✓                     | ?                      | ✓         | ✓                 | X         | ✓                                     | ✓                | ✓                             |
| MacGowan, 2014                    | ?                     | ?                      | ?         | ?                 | X         | ✓                                     | ✓                | X                             |
| Margolin, 2003                    | ?                     | ?                      | ?         | ?                 | X         | ?                                     | X                | X                             |
| Naar-King, 2006                   | ✓                     | ✓                      | ?         | ?                 | X         | ✓                                     | ✓                | ✓                             |
| Naar-King, 2009                   | ✓                     | ✓                      | ?         | ✓                 | ✓         | ✓                                     | ✓                | ✓                             |
| Healthy Living Project Team, 2007 | ✓                     | ✓                      | ?         | ?                 | ✓         | ✓                                     | ✓                | ✓                             |
| Purcell, 2007                     | ✓                     | ?                      | ?         | ✓                 | X         | ✓                                     | ✓                | ✓                             |
| Reznick, 2013                     | ✓                     | ✓                      | ?         | ✓                 | ?         | ?                                     | ✓                | ✓                             |
| Rotheram-Borus, 2004              | ?                     | ?                      | ?         | ?                 | ✓         | ?                                     | ✓                | ✓                             |
| Wolitski, 2010                    | ✓                     | ✓                      | X         | X                 | ✓         | ?                                     | ✓                | ✓                             |
| Wyatt, 2004                       | ?                     | ?                      | ?         | ?                 | ?         | ?                                     | ✓                | X                             |
